# Supplementary material for: Belimumab Decreases Autophagy and Citrullination in Peripheral Blood Mononuclear Cells from Patients with Systemic Lupus Erythematosus
Source: MDPI journal article supplement (doi:10.3390/cells11020262), 2022-01-13
Supplement: s1 [file s1]

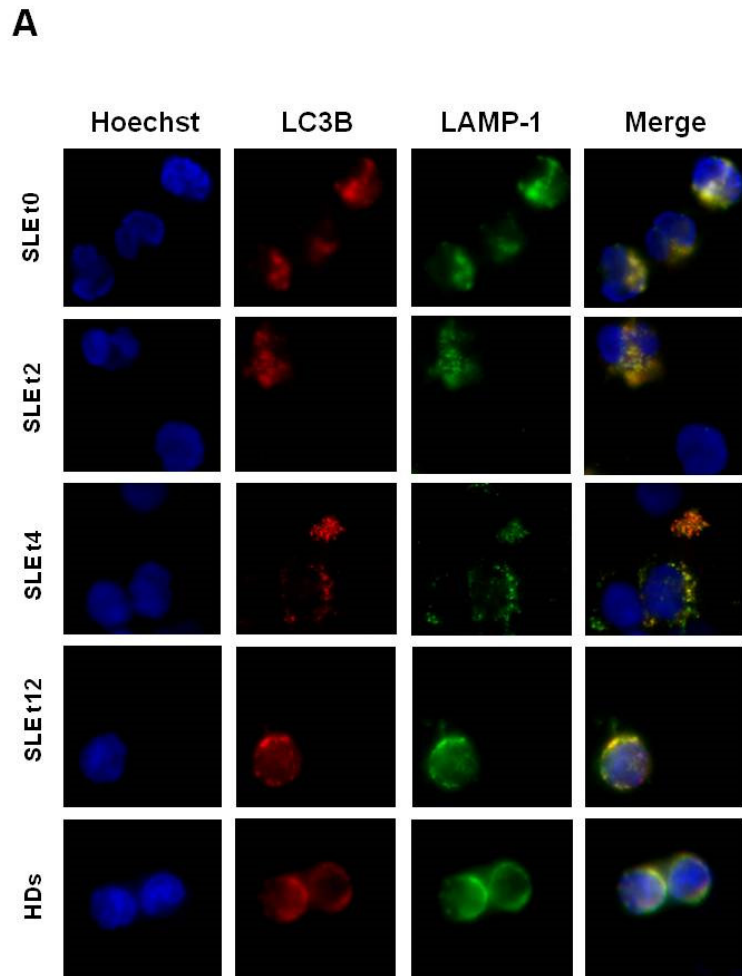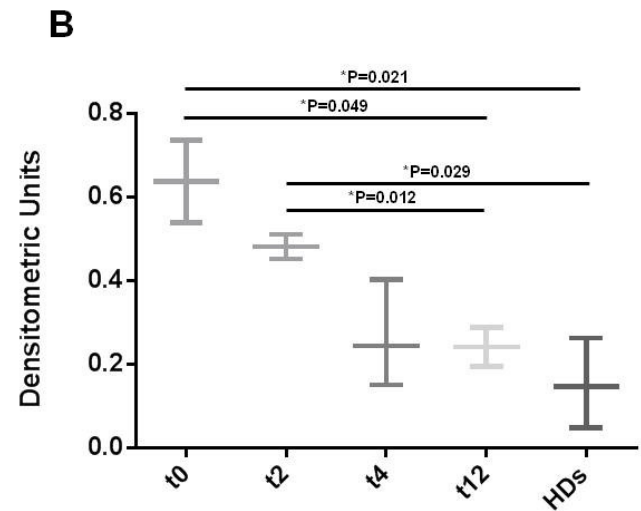

**Supplementary Figure S1.** Immunofluorescence analysis of LC3B and LAMP-1 localization in PBMCs from SLE patients and HDs. **A** representative image of LC3B expression as LC3 puncta (red fluorescence) and LAMP-1 expression (green fluorescence) in Triton X-100-permeated cells. PBMCs from SLE patients at (A) baseline (t0) and after 2, 4 and 12 weeks (t2, t4 and t12) of belimumab administration and from HDs. Results from a representative experiment are shown. Cells were stained with Hoechst dye to reveal nuclei (blue staining). The yellow spots indicate co-localization (merge) of the two markers in autophagic cells. A diffuse cytoplasm staining with virtually no puncta is visible at t0 and t2, while at t4 and then at t12, a typical punctate staining is observable, more similar to that of the HDs, in which rare yellow spots (autophagic vacuoles) are present. Magnification: 100X. **(B)** Quantification by densitometry evaluation of LC3B and LAMP-1 co-localization (merge yellow spots) from positive cells, as resulted by immunofluorescent staining for each condition in 3 independent experiments. In PBMCs from SLE patients, a reduction at all the timepoints and significant differences with respect to HDs were observed ( $P=0.049$  t0 vs t12,  $P=0.021$  t0 vs HDs,  $P=0.012$  t2 vs t12,  $P=0.029$  t2 vs HDs). Results are represented as mean  $\pm$  standard deviation (SD) of densitometric units.

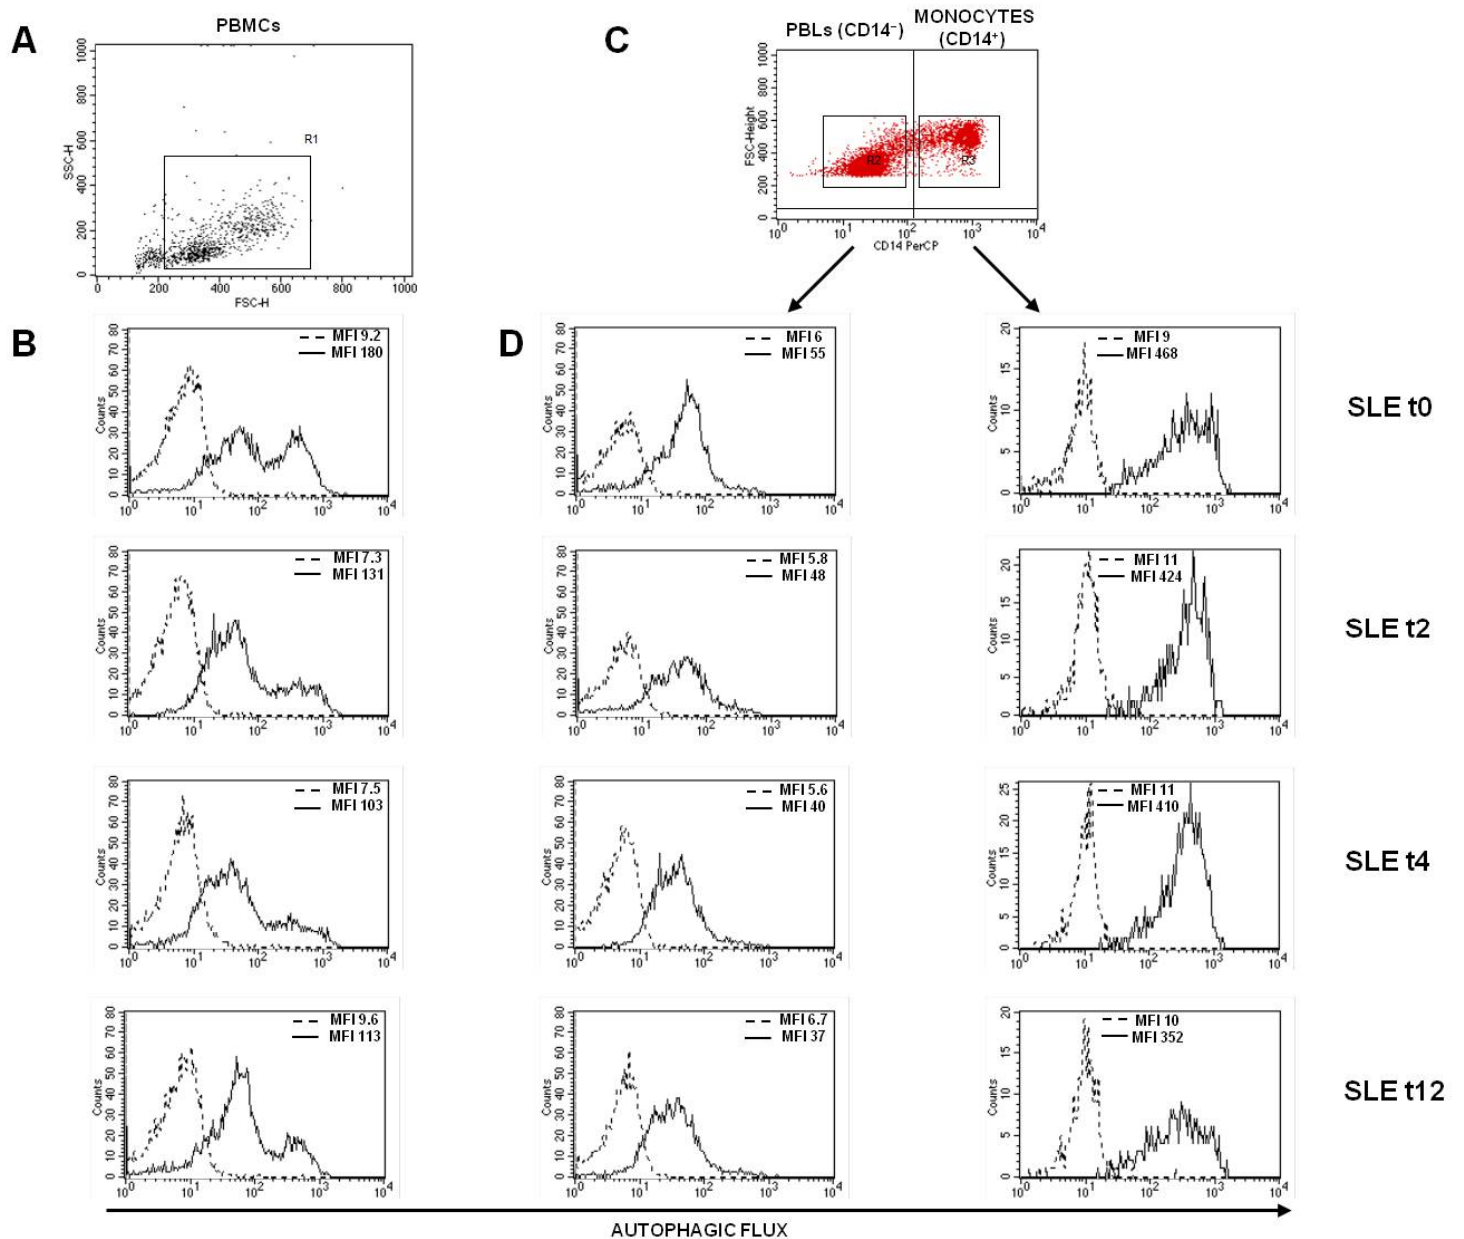

**Supplementary Figure S2.** Flow cytometric analysis of autophagic vacuoles accumulation in total PBMCs, PBLs (CD14<sup>-</sup> cells) and monocytes (CD14<sup>+</sup> cells) from SLE patients being treated with belimumab. (A), (C) Phenotypic characterization of PBMCs from 26 SLE patients by showing the expression of PBLs (CD14<sup>-</sup> cells) and monocytes (CD14<sup>+</sup> cells). Flow cytometric images represent PBMCs population (R1 gate) and PBLs (CD14<sup>-</sup> cells, R2 gate, left quadrant) and monocytes (CD14<sup>+</sup> cells, R3 gate, right quadrant). Results from a representative experiment are shown. (B), (D) Flow cytometric analysis of cells stained with a selective dye monitoring autophagic flux and anti-CD14 mAbs. Autofluorescence is represented by the black-broken line and autophagic vacuoles accumulation by the black-solid line. Results obtained in a representative experiment are shown as mean fluorescence intensity (MFI).

**Table S1.** Flow cytometric analysis of autophagic vacuoles accumulation in total PBMCs, PBLs (CD14<sup>-</sup> cells) and monocytes (CD14<sup>+</sup> cells) from SLE patients being treated with belimumab.

| Autophagic vacuoles accumulation    |                                    |                                 |
|-------------------------------------|------------------------------------|---------------------------------|
|                                     | (Mean Intensity Fluorescence)      | <i>P</i> value vs baseline (t0) |
| Fold increase                       |                                    |                                 |
| <b>t0</b>                           | <b>Median (25°-75° percentile)</b> |                                 |
| PBMCs                               | 14.1 (7.3-15.6)                    |                                 |
| PBLs (CD14 <sup>-</sup> cells)      | 11.3 (7.7-15)                      |                                 |
| Monocytes (CD14 <sup>+</sup> cells) | 51 (22-51.5)                       |                                 |
| <b>t2</b>                           | <b>Median (25°-75° percentile)</b> |                                 |
| PBMCs                               | 13.7 (11.8-15.7)                   | <b>*0.048</b>                   |
| PBLs (CD14 <sup>-</sup> cells)      | 8.2 (6.7-9)                        | 0.081                           |
| Monocytes (CD14 <sup>+</sup> cells) | 33.5 (15.8-36.7)                   | <b>*0.018</b>                   |
| <b>t4</b>                           | <b>Median (25°-75° percentile)</b> |                                 |
| PBMCs                               | 8.4 (8-15)                         | 0.05                            |
| PBLs (CD14 <sup>-</sup> cells)      | 6.3 (4.5-8.8)                      | <b>*0.031</b>                   |
| Monocytes (CD14 <sup>+</sup> cells) | 32 (27-37)                         | <b>*0.019</b>                   |
| <b>t12</b>                          | <b>Median (25°-75° percentile)</b> |                                 |
| PBMCs                               | 8.3 (5.9-17.7)                     | <b>*0.044</b>                   |
| PBLs (CD14 <sup>-</sup> cells)      | 5.9 (5.9-6.5)                      | <b>*0.014</b>                   |
| Monocytes (CD14 <sup>+</sup> cells) | 29.3 (25-33)                       | <b>*0.035</b>                   |
